# Supplementary material for: Long-Term Safety of Dapagliflozin in Older Patients with Type 2 Diabetes Mellitus: A Pooled Analysis of Phase IIb/III Studies
Source: Springer Nature journal article supplement (doi:10.1007/s40266-016-0382-1), 2016-06-29
Supplement: MOESM2 [file 10305272]

### HbA<sub>1c</sub> <65 years

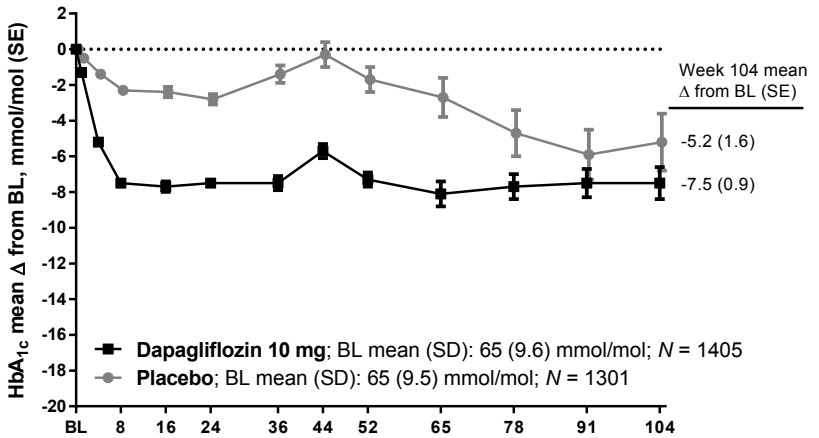

N° patients

|                     | BL   | 8    | 16   | 24   | 36  | 44  | 52  | 65  | 78  | 91  | 104 |
|---------------------|------|------|------|------|-----|-----|-----|-----|-----|-----|-----|
| Dapagliflozin 10 mg | 1405 | 1311 | 1040 | 1180 | 473 | 348 | 416 | 199 | 176 | 160 | 149 |
| Placebo             | 1301 | 1159 | 818  | 869  | 358 | 241 | 244 | 100 | 83  | 68  | 66  |

### HbA<sub>1c</sub> ≥65 years

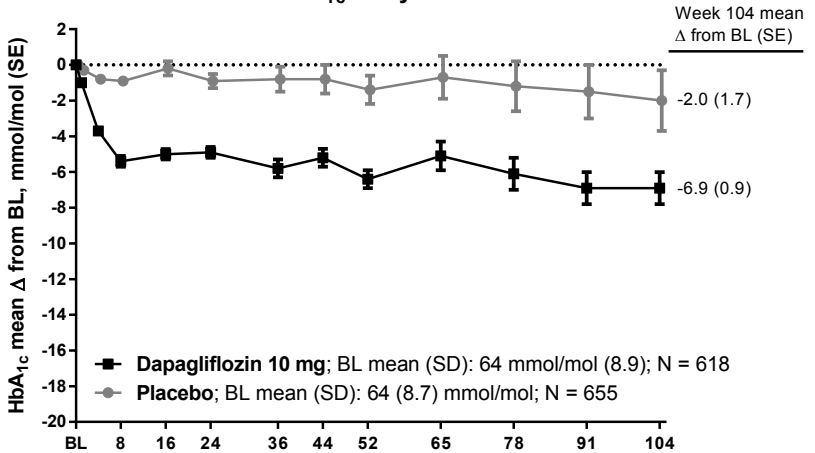

N° patients

|                     | BL  | 8   | 16  | 24  | 36  | 44  | 52  | 65  | 78 | 91 | 104 |
|---------------------|-----|-----|-----|-----|-----|-----|-----|-----|----|----|-----|
| Dapagliflozin 10 mg | 618 | 568 | 473 | 486 | 293 | 239 | 243 | 105 | 97 | 84 | 70  |
| Placebo             | 655 | 573 | 442 | 434 | 227 | 175 | 164 | 76  | 63 | 52 | 46  |
