# Supplementary material for: Long-Term Safety of Dapagliflozin in Older Patients with Type 2 Diabetes Mellitus: A Pooled Analysis of Phase IIb/III Studies
Source: Springer Nature journal article supplement (doi:10.1007/s40266-016-0382-1), 2016-06-29
Supplement: MOESM3 [file 10305272]

**Online Resource 8** Change from baseline in body weight over time by age group. Timepoints with the highest number of patients were selected. Data available up to 104 weeks; excludes data after rescue therapy. *BL* baseline, *SD* standard deviation, *SE* standard error

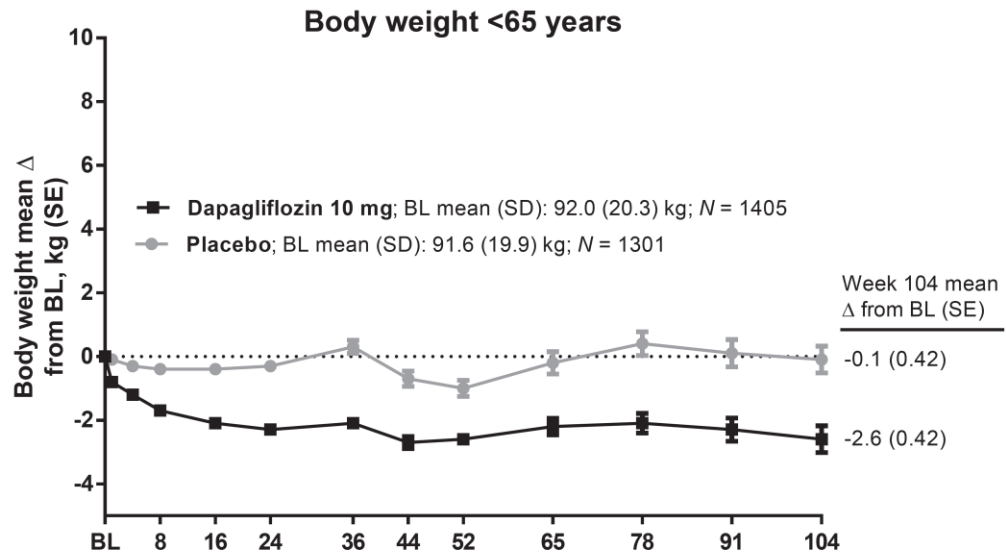

| N° patients         | BL   | 8    | 16   | 24   | 36  | 44  | 52  | 65  | 78  | 91  | 104 |
|---------------------|------|------|------|------|-----|-----|-----|-----|-----|-----|-----|
| Dapagliflozin 10 mg | 1405 | 1319 | 1102 | 1191 | 474 | 350 | 417 | 200 | 176 | 161 | 150 |
| Placebo             | 1301 | 1165 | 881  | 874  | 357 | 241 | 245 | 101 | 83  | 68  | 67  |

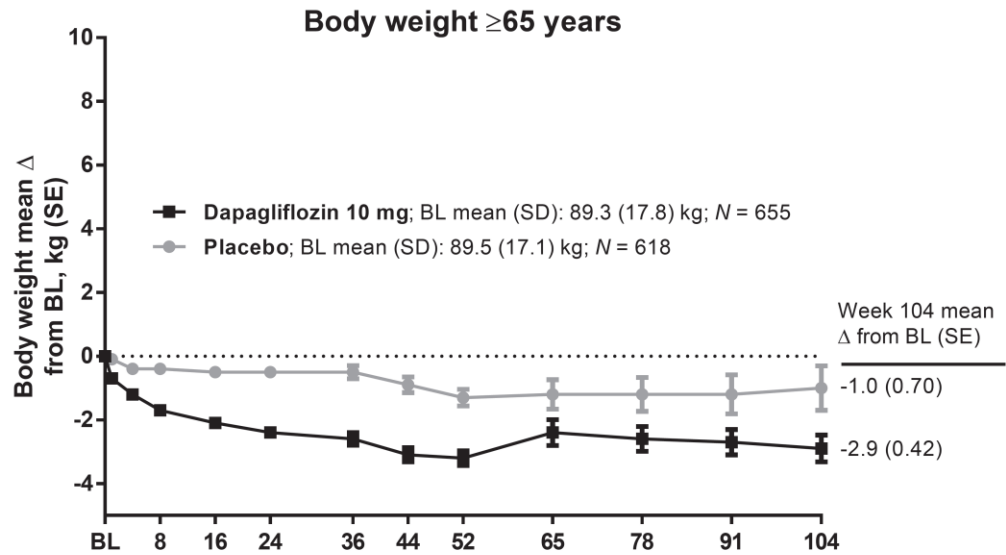

| N° patients         | BL  | 8   | 16  | 24  | 36  | 44  | 52  | 65  | 78 | 91 | 104 |
|---------------------|-----|-----|-----|-----|-----|-----|-----|-----|----|----|-----|
| Dapagliflozin 10 mg | 618 | 574 | 502 | 497 | 293 | 241 | 245 | 106 | 98 | 85 | 71  |
| Placebo             | 655 | 574 | 472 | 446 | 227 | 176 | 163 | 77  | 64 | 52 | 47  |

<sup>a</sup>Subpopulation of the ≥65-year age group
