# Supplementary material for: Long-Term Safety of Dapagliflozin in Older Patients with Type 2 Diabetes Mellitus: A Pooled Analysis of Phase IIb/III Studies
Source: Springer Nature journal article supplement (doi:10.1007/s40266-016-0382-1), 2016-06-29
Supplement: MOESM4 [file 10305272]

**Online Resource 9** Change from baseline in SBP over time by age group. Data available up to 102 weeks; excludes data after rescue therapy. *BL* baseline, *SBP* systolic blood pressure, *SE* standard error, *SD* standard deviation

### SBP <65 years

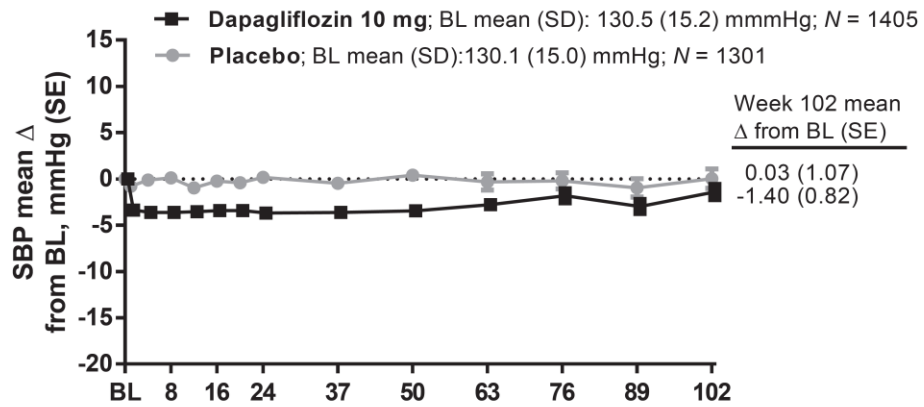

| N° patients         | BL   | 8    | 16   | 24   | 37   | 50  | 63  | 76  | 89  | 102 |
|---------------------|------|------|------|------|------|-----|-----|-----|-----|-----|
| Dapagliflozin 10 mg | 1405 | 1318 | 1208 | 1190 | 1102 | 571 | 422 | 366 | 336 | 286 |
| Placebo             | 1301 | 1157 | 981  | 870  | 741  | 967 | 228 | 189 | 160 | 137 |

### SBP ≥65 years

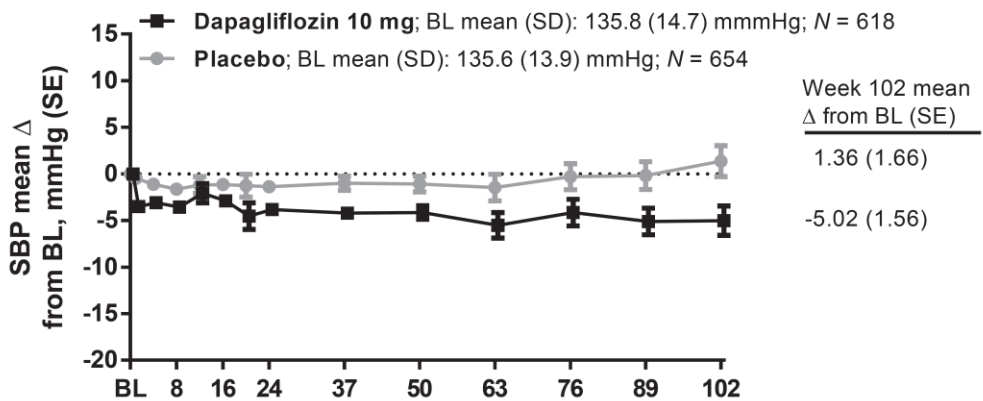

| N° patients         | BL  | 8   | 16  | 24  | 37  | 50  | 63  | 76  | 89  | 102 |
|---------------------|-----|-----|-----|-----|-----|-----|-----|-----|-----|-----|
| Dapagliflozin 10 mg | 618 | 566 | 521 | 488 | 443 | 366 | 141 | 129 | 116 | 99  |
| Placebo             | 654 | 573 | 494 | 437 | 366 | 277 | 111 | 96  | 81  | 72  |

<sup>a</sup>Subpopulation of the ≥65-year age group
